# Supplementary material for: Multi-Fetal Pregnancy, Preeclampsia, and Long-Term Cardiovascular Disease
Source: PubMed Central journal article supplement — Hypertension. 2020 Jun 1;76(1):167–75. doi: 10.1161/HYPERTENSIONAHA.120.14860 (PMC7289126; doi:10.1161/hypertensionaha.120.14860), 2020-06-01
Supplement: hyp-76-167-s002.pdf [file hyp-76-167-s002.pdf]

# Multi-fetal pregnancy, preeclampsia and long-term cardiovascular disease

Lina Bergman<sup>1,2</sup>, Paliz Nordlöf-Callbo<sup>1</sup>, Anna Karin Wikström<sup>1</sup>, Jonathan M Snowden<sup>3,4</sup>, Susanne Hesselman<sup>1,6</sup>, Anna Karin Edstedt Bonamy<sup>5</sup>, Anna Sandström<sup>1,4,5</sup>

<sup>1</sup> Department of Women's and Children's health, Uppsala University, Uppsala, Sweden

<sup>2</sup> Department of Obstetrics and Gynecology, Institute of Clinical Science, Sahlgrenska Academy, University of Gothenburg

<sup>3</sup> School of Public Health, Oregon Health and Science University-Portland State University, Portland, U.S.A.

<sup>4</sup> Department of Obstetrics and Gynecology, Oregon Health and Science University, Portland, OR, U.S.A

<sup>5</sup> Department of Medicine, Solna, Clinical Epidemiology Division, Karolinska Institutet, Stockholm, Sweden

<sup>6</sup> Center for Clinical Research, Uppsala University, Falun, Sweden

Short title: Multi-fetal pregnancy and cardiovascular disease

Total word count: 6990

Number of figures: 2

Number of tables: 3 in main text, 5 as supplemental

Corresponding author:

Lina Bergman

Department of Obstetrics and Gynecology

PO Kvinnokliniken SU Östra

SE 416 85 Göteborg

Sweden

Telephone number 0046707920780

Email: [lina.bergman.2@gu.se](mailto:lina.bergman.2@gu.se)

**Table S1.** ICD codes for exposures and outcomes

| Exposure variables                       |                                                                                 |       |                                                                                                 |        |                                                              |
|------------------------------------------|---------------------------------------------------------------------------------|-------|-------------------------------------------------------------------------------------------------|--------|--------------------------------------------------------------|
| ICD 10                                   |                                                                                 | ICD 9 |                                                                                                 | ICD 8  |                                                              |
| <b>Preeclampsia</b>                      |                                                                                 |       |                                                                                                 |        |                                                              |
| O11                                      | Preeclampsia superimposed on chronic hypertension                               | 642H  | Pre-eclampsia or eclampsia superimposed on pre-existing hypertension                            |        |                                                              |
| O14                                      | Preeclampsia                                                                    |       |                                                                                                 | 637    | Pre-eclampsia, eclampsia and toxicosis not further specified |
| Q14.0                                    | Mild to moderate preeclampsia                                                   | 42E   | Mild or unspecified preeclampsia                                                                |        |                                                              |
| O14.1                                    | Severe preeclampsia                                                             | 642F  | Severe preeclampsia                                                                             |        |                                                              |
| O14.2                                    | HELLP syndrome                                                                  |       |                                                                                                 |        |                                                              |
| O14.9                                    | Preeclampsia, unspecified                                                       |       |                                                                                                 | 637,99 | Toxicosis not further specified                              |
| O15                                      | Eclampsia                                                                       | 642G  | Eclampsia                                                                                       | 637,10 | Eclampsia                                                    |
| <b>Essential hypertension</b>            |                                                                                 |       |                                                                                                 |        |                                                              |
| I10                                      | Essential hypertension                                                          | 401   | Essential hypertonia                                                                            | 400    | Malign essential hypertension                                |
|                                          |                                                                                 |       |                                                                                                 | 401,99 | Benign essential hypertension                                |
|                                          |                                                                                 | 402   | Hypertension with cardiac disease                                                               | 402,99 | Hypertension with cardiac disease                            |
|                                          | Hypertensive renal disease                                                      | 403   | Essential hypertension with chronic kidney disease                                              | 403,99 | Essential hypertension with chronic kidney disease           |
| I12                                      |                                                                                 | 404   | Hypertension with cardiac and kidney disease                                                    | 404    | Hypertension with cardiac and kidney disease                 |
| I15                                      | Secondary hypertension                                                          | 405   | Secondary hypertension                                                                          |        |                                                              |
| O10                                      | Pre-existing hypertension complicating pregnancy, childbirth and the puerperium | 642C  | Other unspecified essential hypertension complicating pregnancy, childbirth, and the puerperium |        |                                                              |
| O11                                      | Preeclampsia superimposed on chronic hypertension                               | 642H  | Pre-eclampsia or eclampsia superimposed on pre-existing hypertension                            |        |                                                              |
| <b>Diabetes mellitus, pregestational</b> |                                                                                 |       |                                                                                                 |        |                                                              |
| E10                                      | Type 1 diabetes mellitus                                                        | 250   | Diabetes mellitus                                                                               |        |                                                              |
| E11                                      | Type 2 diabetes mellitus                                                        | 648A  | Diabetes mellitus                                                                               |        |                                                              |
| E12                                      | Malnutrition-related diabetes mellitus                                          |       |                                                                                                 |        |                                                              |

- E13 Other specified diabetes mellitus
- E14 Unspecified diabetes mellitus
- O24.1 Type 2 diabetes mellitus, pregestational
- O24.2 Malnutrition-related diabetes mellitus, pregestational
- O24.3 Unspecified diabetes mellitus, pregestational

**Diabetes mellitus, gestational**

- O24.4 Diabetes mellitus, gestational      648W      Abnormal glucose tolerance during pregnancy

**Outcome variables**

| ICD 10                        |                                                                     | ICD 9 |                                                          | ICD 8  |                                                                           |
|-------------------------------|---------------------------------------------------------------------|-------|----------------------------------------------------------|--------|---------------------------------------------------------------------------|
| <b>Ischemic heart disease</b> |                                                                     |       |                                                          |        |                                                                           |
| I20                           | Angina pectoris                                                     | 413   | Angina pectoris                                          | 413    | Angina pectoris                                                           |
| I21                           | Acute myocardial infarction                                         | 410   | Acute myocardial infarction                              | 410    | Acute myocardial infarction                                               |
| I22                           | Subsequent myocardial infarction                                    | 411   | Other acute and subacute forms of ischemic heart disease | 411    | Other acute and subacute forms of ischaemic heart disease                 |
| I23                           | Certain current complications following acute myocardial infarction | 412   | Old myocardial infarction                                | 412,91 | Old myocardial infarction, with no information of hypertension            |
| I24                           | Other acute ischaemic heart diseases                                | 414W  | Other chronic ischemic heart disease, specified          | 414,00 | Asymptomatic ischaemic heart disease, with hypertension                   |
| I25                           | Chronic ischaemic heart disease                                     | 414X  | Chronic ischemic heart disease, unspecified              | 414,99 | Asymptomatic ischaemic heart disease, with no information of hypertension |
|                               |                                                                     | 414A  | Coronary arteriosclerosis of native coronary artery      |        |                                                                           |

**Heart failure**

- I11.0 Hypertensive heart disease with (congestive) heart failure
- I13.0 Hypertensive heart and renal disease with (congestive) heart failure

|                                |                                                                                             |      |                                                     |        |                                                     |
|--------------------------------|---------------------------------------------------------------------------------------------|------|-----------------------------------------------------|--------|-----------------------------------------------------|
| I13.2                          | Hypertensive heart and renal disease with both (congestive) heart failure and renal failure |      |                                                     |        |                                                     |
| I50                            | Heart failure                                                                               | 428  | Congestive heart failure, unspecified               | 428.99 | Heart failure, unspecified                          |
| <b>Cerebrovascular disease</b> |                                                                                             |      |                                                     |        |                                                     |
| I60.0-7                        | Subarachnoid haemorrhage                                                                    | 430  | Subarachnoid haemorrhage                            | 430    | Subarachnoid haemorrhage                            |
| I61                            | Intracerebral haemorrhage                                                                   | 431  | Intracerebral haemorrhage                           | 431    | Intracerebral haemorrhage                           |
| I62                            | Other nontraumatic intracranial haemorrhage                                                 | 432  | Other and unspecified intracranial haemorrhage      | 433    | Cerebral thrombosis                                 |
| I63                            | Cerebral infarction                                                                         | 434  | Occlusion of cerebral arteries                      | 434    | Cerebral embolism                                   |
| I64                            | Stroke, not specified as haemorrhage or infarction                                          | 436  | Acute cerebrovascular disease, incompletely defined | 436    | Acute, cerebrovascular disease, not further defined |
| I65                            | Occlusion and stenosis of precerebral arteries, not resulting in cerebral infarction        | 433  | Occlusion and stenosis of precerebral arteries      | 432    | Occlusion of precerebral arteries                   |
| I66                            | Occlusion and stenosis of cerebral arteries, not resulting in cerebral infarction           | 437B | Other generalised ischaemic cerebrovascular disease | 437    | Generalised ischaemic cerebrovascular disease       |
| I67.2                          | Cerebral arteriosclerosis                                                                   | 437A | Cerebral arterioerosclerosis                        |        |                                                     |
| I69                            | Sequelae of cerebrovascular disease                                                         | 438  | Later effects by cerebrovascular disease            | 438    | Cerebrovascular disease, not further defined        |
| G45                            | Transient cerebral ischaemic attacks and related syndromes                                  | 435  | Transient cerebral ischemia                         | 435    | Transient cerebral ischaemia                        |

**Table S2.** Maternal and pregnancy characteristics according to singleton pregnancy without and with preeclampsia or multi-fetal pregnancy without and with preeclampsia in first deliveries in the restricted population of 186 775 births **1995-2010**

| Maternal and pregnancy characteristics of first births | Singleton pregnancy  |             |                   |             | Multi-fetal pregnancy |             |                     |             |
|--------------------------------------------------------|----------------------|-------------|-------------------|-------------|-----------------------|-------------|---------------------|-------------|
|                                                        | Without preeclampsia |             | With preeclampsia |             | Without preeclampsia* |             | With preeclampsia** |             |
|                                                        | 1995-2010            | N           | N                 | N           | N                     | N           | N                   |             |
| <b>N Total = 186 775</b>                               | 173 247              | 9 031       | 3 764             | 733         |                       |             |                     |             |
| <b>BMI kg/m<sup>2</sup> %</b>                          |                      |             |                   |             |                       |             |                     |             |
| <18.5                                                  | 2 785                | <b>1.9</b>  | 93                | <b>1.2</b>  | 47                    | <b>1.5</b>  | 7                   | <b>1.2</b>  |
| 18.5-24.9                                              | 101 461              | <b>68.9</b> | 4 007             | <b>52.2</b> | 2 044                 | <b>65.0</b> | 356                 | <b>60.1</b> |
| 25-29.9                                                | 32 332               | <b>22.0</b> | 2 293             | <b>29.9</b> | 803                   | <b>25.5</b> | 165                 | <b>27.9</b> |
| ≥30                                                    | 10 713               | <b>7.3</b>  | 1 289             | <b>16.8</b> | 251                   | <b>8.0</b>  | 64                  | <b>10.8</b> |
| Missing                                                | 25 956               |             | 1 349             |             | 619                   |             | 141                 |             |
| <b>Diabetes %</b>                                      |                      |             |                   |             |                       |             |                     |             |
| No                                                     | 171 128              | <b>98.8</b> | 8 712             | <b>96.5</b> | 3 713                 | <b>98.7</b> | 723                 | <b>98.6</b> |
| Preexisting                                            | 874                  | <b>0.5</b>  | 184               | <b>2.0</b>  | 16                    | <b>0.4</b>  | 2                   | <b>0.3</b>  |
| Gestational                                            | 1 245                | <b>0.7</b>  | 135               | <b>1.5</b>  | 35                    | <b>0.9</b>  | 8                   | <b>1.1</b>  |
| <b>Kidney disease %</b>                                | 603                  | <b>0.4</b>  | 39                | <b>0.4</b>  | 20                    | <b>0.5</b>  | 1                   | <b>0.1</b>  |
| <b>SLE %</b>                                           | 126                  | <b>0.1</b>  | 11                | <b>0.1</b>  | 4                     | <b>0.1</b>  | 1                   | <b>0.1</b>  |
| <b>Assisted reproduction %</b>                         |                      |             |                   |             |                       |             |                     |             |
| No                                                     | 162 047              | <b>93.5</b> | 8 382             | <b>92.8</b> | 2 317                 | <b>61.6</b> | 465                 | <b>63.4</b> |
| Ovary stimulation                                      | 2 890                | <b>1.7</b>  | 191               | <b>2.1</b>  | 186                   | <b>4.9</b>  | 25                  | <b>3.4</b>  |
| IVF                                                    | 8 310                | <b>4.8</b>  | 458               | <b>5.1</b>  | 1 261                 | <b>33.5</b> | 243                 | <b>33.2</b> |

\* Multiple pregnancy without preeclampsia including triplex or more n=84

\*\* Multiple pregnancy with preeclampsia including triplex or more n=17

**Table S3.** Singleton and multi-fetal pregnancies with and without preeclampsia according to later compound cardiovascular disease, and ischemic heart disease, heart failure and cerebrovascular disease separately, among 892 425 first deliveries **1973-2010**

| Maternal and pregnancy characteristics of first birth 1973-2010 | Total   | Compound cardiovascular disease* |            | Ischemic heart disease |            | Heart failure |            | Cerebrovascular disease |            |
|-----------------------------------------------------------------|---------|----------------------------------|------------|------------------------|------------|---------------|------------|-------------------------|------------|
|                                                                 |         | N                                | %          | N                      | %          | N             | %          | N                       | %          |
| <b>Total</b>                                                    | 892 425 | 18 415                           | <b>2.1</b> | 7 659                  | <b>0.9</b> | 1 993         | <b>0.2</b> | 9 032                   | <b>1.0</b> |
| <b>Singleton</b>                                                | 880 971 | 18 246                           | <b>2.1</b> | 7 589                  | <b>0.9</b> | 1 975         | <b>0.2</b> | 8 947                   | <b>1.0</b> |
| Singleton without preeclampsia                                  | 847 567 | 17 217                           | <b>2.0</b> | 7 120                  | <b>0.8</b> | 1 862         | <b>0.2</b> | 8 486                   | <b>1.0</b> |
| Singleton with preeclampsia                                     | 33 404  | 1 029                            | <b>3.1</b> | 469                    | <b>1.4</b> | 113           | <b>0.3</b> | 461                     | <b>1.4</b> |
| <b>Multi-fetal</b>                                              | 11 454  | 169                              | <b>1.5</b> | 70                     | <b>0.6</b> | 18            | <b>0.2</b> | 85                      | <b>0.7</b> |
| Multi-fetal without preeclampsia                                | 9 935   | 145                              | <b>1.5</b> | 63                     | <b>0.6</b> | 17            | <b>0.2</b> | 69                      | <b>0.7</b> |
| Multi-fetal with preeclampsia                                   | 1 519   | 24                               | <b>1.6</b> | 7                      | <b>0.5</b> | 1             | <b>0.1</b> | 16                      | <b>1.1</b> |

\* The number of compound cardiovascular disease is lower than the sum of the numbers of ischemic heart disease, heart failure and cerebrovascular disease, since some events occurred at the same time.

**Table S4.** Maternal and pregnancy characteristics according to later compound cardiovascular disease in the restricted population of 186 775 first deliveries **1995-2010**

| Maternal and pregnancy characteristics of first births 1995-2010 | Total   | Compound cardiovascular disease |            | P-value |
|------------------------------------------------------------------|---------|---------------------------------|------------|---------|
|                                                                  |         | N                               | %          |         |
| <b>Total</b>                                                     | 186 775 | 987                             | <b>0.5</b> |         |
| <b>Maternal age at birth, years</b>                              |         |                                 |            | <.0001  |
| <30                                                              | 62 804  | 303                             | <b>0.5</b> |         |
| 30-34                                                            | 77 141  | 391                             | <b>0.5</b> |         |
| 35-39                                                            | 39 034  | 22                              | <b>0.6</b> |         |
| ≥40                                                              | 7 796   | 71                              | <b>0.9</b> |         |
| <b>BMI, kg/m<sup>2</sup></b>                                     |         |                                 |            | <.0001  |
| <18.5                                                            | 2 932   | 13                              | <b>0.4</b> |         |
| 18.5-24.9                                                        | 107 868 | 446                             | <b>0.4</b> |         |
| 25-29.9                                                          | 35 593  | 221                             | <b>0.6</b> |         |
| ≥30                                                              | 12 317  | 134                             | <b>1.1</b> |         |
| Missing (n)                                                      | 28 065  | 173                             |            |         |
| <b>Diabetes</b>                                                  |         |                                 |            | <.0001  |
| No                                                               | 184 276 | 932                             | <b>0.5</b> |         |
| Pregestational                                                   | 1 076   | 36                              | <b>3.4</b> |         |
| Gestational                                                      | 1 423   | 19                              | <b>1.3</b> |         |
| <b>Kidney disease</b>                                            |         |                                 |            | 0.7899  |
| No                                                               | 186 112 | 983                             | <b>0.5</b> |         |
| Yes                                                              | 663     | 4                               | <b>0.6</b> |         |
| <b>SLE</b>                                                       |         |                                 |            | 0.0092  |
| No                                                               | 186 633 | 984                             | <b>0.5</b> |         |
| Yes                                                              | 142     | 3                               | <b>2.1</b> |         |
| <b>Assisted reproduction</b>                                     |         |                                 |            | 0.6741  |
| No                                                               | 173 211 | 922                             | <b>0.5</b> |         |
| Ovary stimulation                                                | 3 292   | 17                              | <b>0.5</b> |         |
| IVF                                                              | 10 272  | 48                              | <b>0.5</b> |         |

**Table S5a:** Hazard ratios for later compound cardiovascular disease from maternal age three months after delivery among 457 147 women with age at end of follow-up **less than 50 years** with singleton first deliveries without and with preeclampsia and multi-fetal first deliveries without and with preeclampsia **1973-2010**

| <b>1973-2010</b>                        | <b>Unadjusted<br/>Hazard<br/>Ratio</b> | <b>(95% CI)</b> | <b>Adjusted*</b> | <b>(95% CI)</b> |
|-----------------------------------------|----------------------------------------|-----------------|------------------|-----------------|
| <b>Singleton without preeclampsia</b>   | <b>ref</b>                             |                 | <b>ref</b>       |                 |
| <b>Singleton with preeclampsia</b>      | <b>1.58</b>                            | (1.46-1.71)     | <b>1.62</b>      | (1.50-1.76)     |
| <b>Multi-fetal without preeclampsia</b> | <b>0.59</b>                            | (0.47-0.74)     | <b>0.80</b>      | (0.64-1.01)     |
| <b>Multi-fetal with preeclampsia</b>    | <b>0.64</b>                            | (0.37-1.11)     | <b>0.96</b>      | (0.55-1.65)     |

\* Adjusted for maternal age at delivery, chronic hypertension before first birth, level of education and time-period of birth.  
Number of observations read: 455 581.

**Table S5b:** Hazard ratios for later compound cardiovascular disease from maternal age three months after delivery among 435 278 women with age at end of follow-up **more than 50 years** with singleton first deliveries without and with preeclampsia and multi-fetal first deliveries without and with preeclampsia **1973-2010**

| <b>1973-2010</b>                        | <b>Crude<br/>Hazard<br/>Ratio</b> | <b>(95% CI)</b> | <b>Adjusted*</b> | <b>(95% CI)</b> |
|-----------------------------------------|-----------------------------------|-----------------|------------------|-----------------|
| <b>Singleton without preeclampsia</b>   | <b>ref</b>                        |                 | <b>ref</b>       |                 |
| <b>Singleton with preeclampsia</b>      | <b>1.58</b>                       | (1.42-1.76)     | <b>1.62</b>      | (1.46-1.81)     |
| <b>Multi-fetal without preeclampsia</b> | <b>1.08</b>                       | (0.85-1.36)     | <b>1.16</b>      | (0.91-1.47)     |
| <b>Multi-fetal with preeclampsia</b>    | <b>1.49</b>                       | (0.82-2.67)     | <b>1.63</b>      | (0.90-2.95)     |

\* Adjusted for maternal age at delivery, chronic hypertension before first birth, level of education and time-period of birth.  
Number of observations read: 433 819.
